# Supplementary material for: Removal of hemolysis interference in serum Raman spectroscopy by multivariate curve resolution analysis for accurate classification of oral cancers
Source: Royal Society of Chemistry journal article supplement (doi:10.1039/d2sd00137c), 2023-01-01
Supplement: d2sd00137c1.pdf [file d2sd00137c1.pdf]

## SUPPLEMENTARY INFORMATION

### Removal of hemolysis interference in serum Raman spectroscopy by multivariate curve resolution analysis for accurate classification of oral cancers

Ajinkya Anjekar,<sup>†a</sup> Priyanka Jadhav,<sup>†bc</sup> Arti Hole,<sup>b</sup> Rajapandian Paneerselvam,<sup>d</sup> Arvind Ingle,<sup>bc</sup> Tatsuyuki

#### CONTROL GROUP

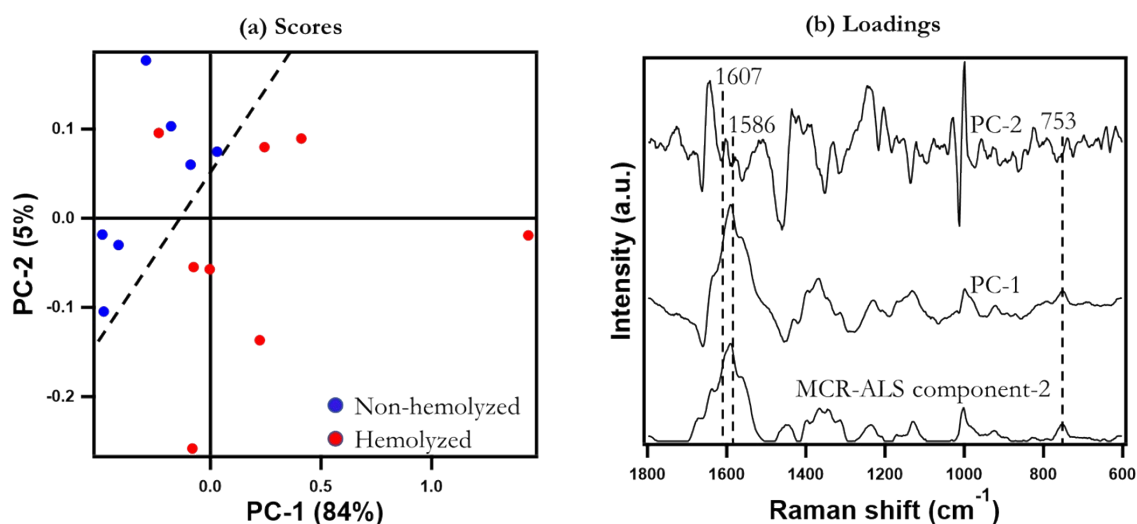

Yamamoto,<sup>ef</sup> Hemanth Noothalapati <sup>\*ef</sup> and Murali Krishna C <sup>bc</sup>

**Figure S1: PCA results of control group containing hemolyzed and non-hemolyzed Raman spectra.** (a) PCA scores showing separability (dotted line) within the group and (b) corresponding PCA loadings compared with MCR-ALS component-2 (heme). PC-1 loading shows heme-related signatures like MCR-ALS component-2 indicating its role in separability.

**Figure S2: PCA results of tumor group containing hemolyzed and non-hemolyzed Raman spectra.** (a) PCA scores showing separability (dotted line) within the group and (b) corresponding PCA loadings compared with MCR-ALS component-2 (heme). PC-1 loading shows heme-related signatures like MCR-ALS component-2 indicating its role in separability.

#### TUMOR GROUP

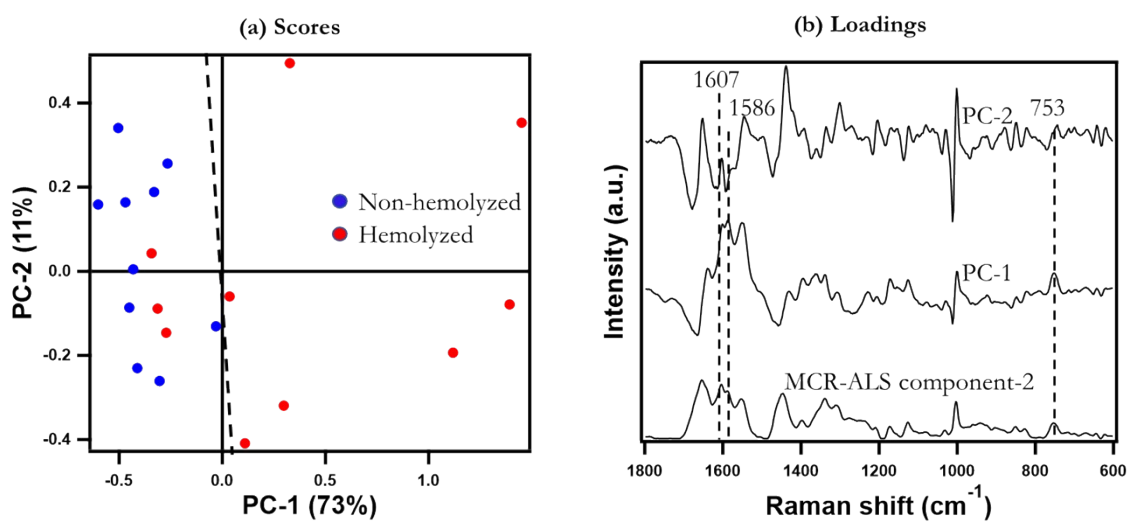

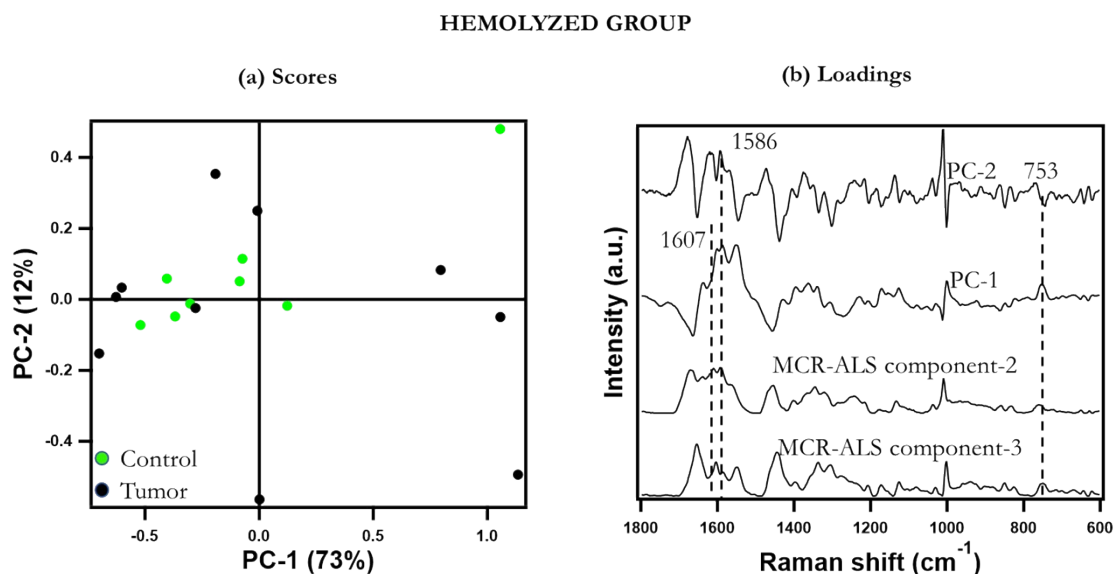

**Figure S3: PCA results of hemolyzed Raman spectra from control and tumor groups.** (a) PCA scores showing no separability between the groups and (b) corresponding PCA loadings compared with MCR-ALS component-2 & 3 (heme). PC-1 loading shows heme-related signatures like MCR-ALS component-2 & 3 indicating its role in non-separability.

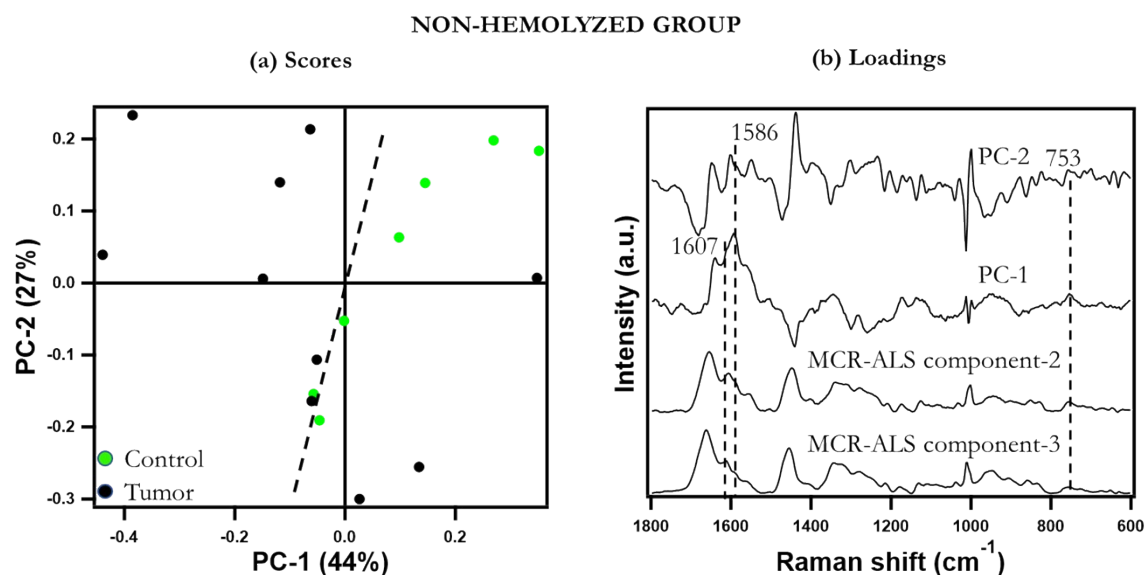

**Figure S4: PCA results of non-hemolyzed Raman spectra from control and tumor groups.** (a) PCA scores showing good separability (dotted line) between the groups and (b) corresponding PCA loadings compared with MCR-ALS component-2 & 3. Though non-hemolyzed samples, heme related signatures are observed bands in PCA. As shown in the

manuscript, removal of such interference leads to even better separation between the two groups.
